# Supplementary material for: Real-time monitoring of the effectiveness of six COVID-19 vaccines in Hungary in 2021 using the screening method
Source: bioRxiv or medRxiv preprint supplement (doi:10.1101/2022.02.18.22271179), 2022-02-19

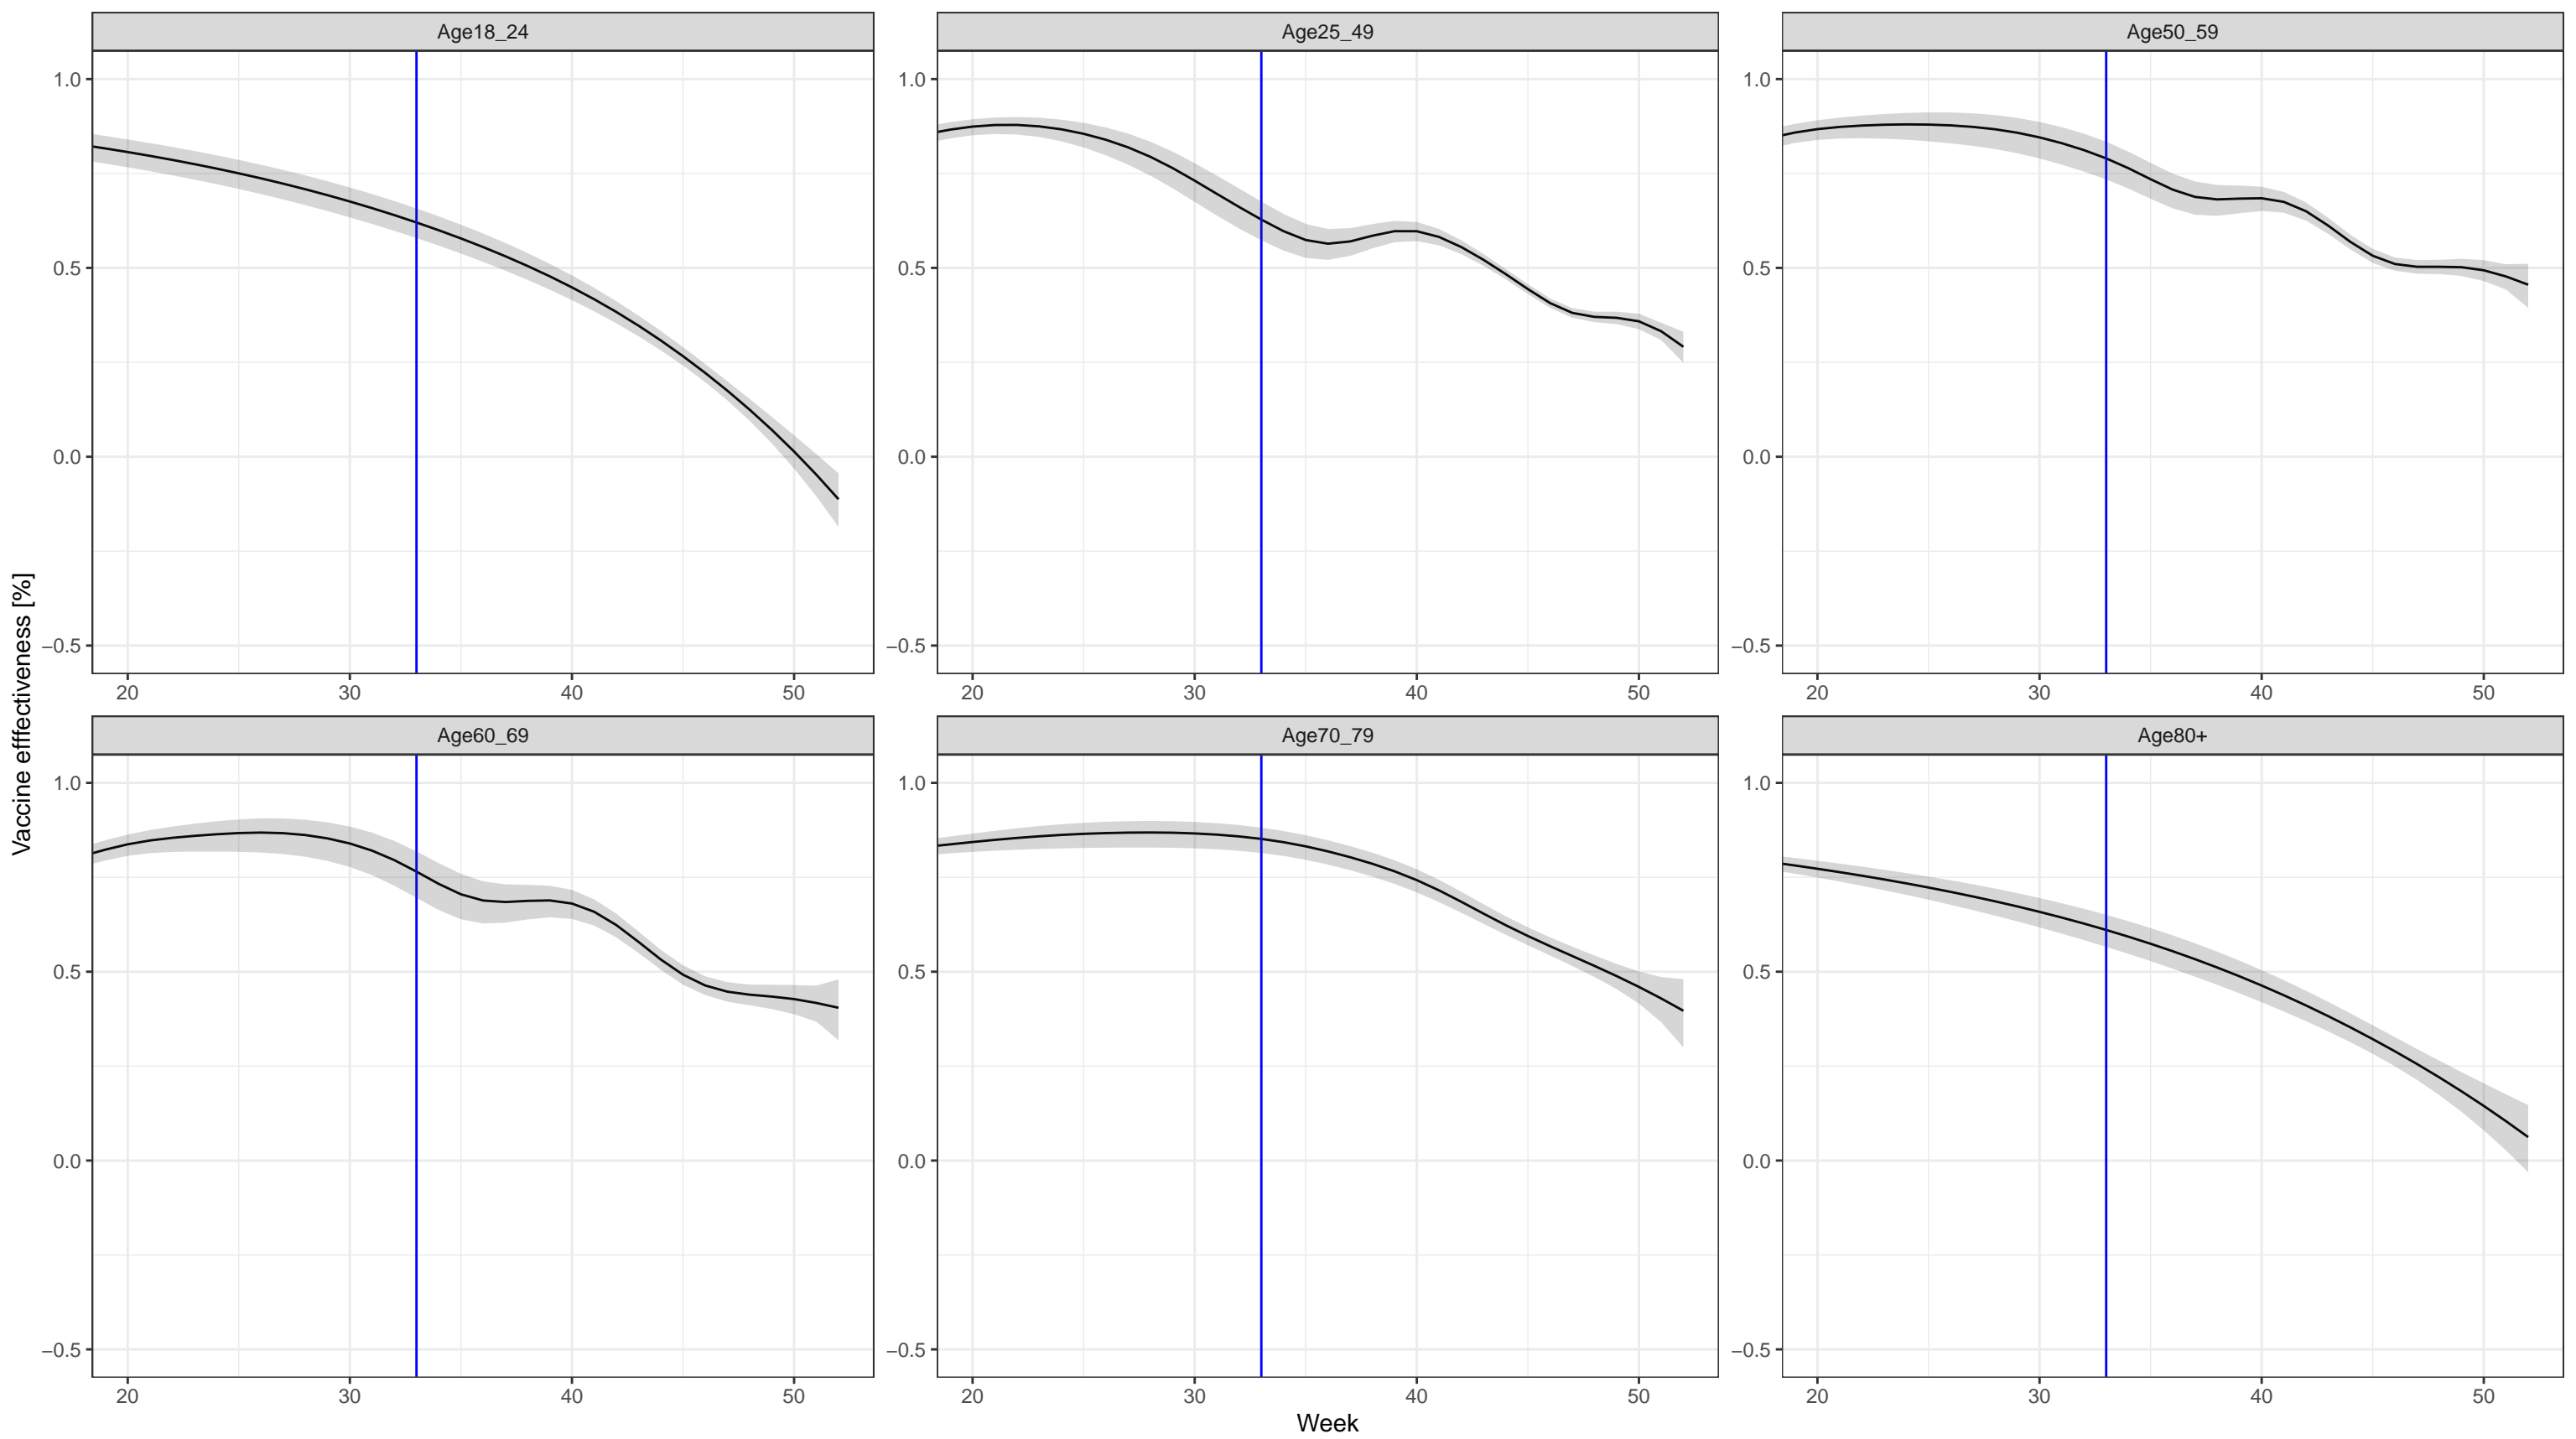

Supplement: Supplementary file [file media-2.pdf]
